# Supplementary material for: Choline Metabolites Reverse Differentially the Habituation Deficit and Elevated Memory of Tau Null Drosophila
Source: MDPI journal article supplement (doi:10.3390/cells13090746), 2024-04-25
Supplement: s1 [file s1]

## SUPPLEMENTAL MATERIAL

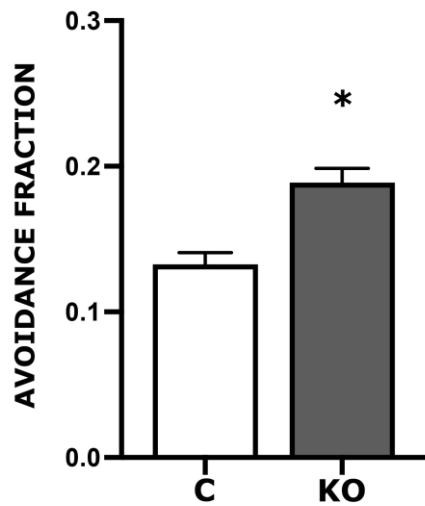

**Supplemental Figure 1.**

Footshock avoidance of dTau KO flies is elevated compared to their isogenic controls  $w^{1118}$  reported as the mean Avoidance Fraction ( $\pm$  SEM), defined as the fraction of naïve flies that avoid the maze arm with an electrified grid at 45V DC and chose the opposing arm. The pooled data from all habituation experiments involving simultaneously untreated animals of both genotypes were used ( $n = 56$  for both genotypes). The difference is statistically significant, ANOVA:  $F_{(1,110)} = 19.3701$ ,  $p < 0.0001$ .

**Supplemental Table 1**

**Comparisons to untreated mutant KO and untreated control w<sup>1118</sup> using LSM**

| Genotype                                                              | Mean     | ± SEM     | F-ratio  | p               |
|-----------------------------------------------------------------------|----------|-----------|----------|-----------------|
| <b>Figure 2a HAB Ch ANOVA F<sub>(3,35)</sub>=7.0912 p=0.0009</b>      |          |           |          |                 |
| w <sup>1118</sup>                                                     | 8.187877 | ±0.958217 | 11.5634  | <b>0.00182</b>  |
| KO 1mM                                                                | 2.49993  | ±1.979148 | 0.765829 | 0.388032        |
| KO 3mM                                                                | 9.615848 | ±1.522158 | 15.36658 | <b>0.000438</b> |
|                                                                       |          |           |          |                 |
| KO                                                                    | 8.187877 | ±0.958217 | 11.5634  | <b>0.00182</b>  |
| KO 1mM                                                                | 2.49993  | ±1.979148 | 5.747581 | <b>0.02252</b>  |
| KO 3mM                                                                | 9.615848 | ±1.522158 | 0.386086 | 0.538765        |
| <b>Figure 2b HAB Ch ANOVA F<sub>(3,51)</sub>=9.0307 p=7.55e-05</b>    |          |           |          |                 |
| w <sup>1118</sup>                                                     | 6.714418 | ±2.072501 | 14.24331 | <b>4.42e-04</b> |
| w <sup>1118</sup> 3 mM                                                | 7.340087 | ±1.815629 | 16.64763 | <b>0.000169</b> |
| KO 3mM                                                                | 8.754506 | ±1.933568 | 21.06629 | <b>3.21e-05</b> |
|                                                                       |          |           |          |                 |
| w <sup>1118</sup> 3 mM                                                | 7.340087 | ±1.815629 | 0.04705  | 0.829198        |
| KO                                                                    | -3.98341 | ±2.132418 | 14.24331 | <b>4.42e-04</b> |
| KO 3mM                                                                | 8.754506 | ±1.933568 | 0.500226 | 0.482821        |
| <b>Figure 2c LTM Ch ANOVA F<sub>(3,38)</sub>=10.0022 p=6.4963e-05</b> |          |           |          |                 |
| w <sup>1118</sup>                                                     | 23.49392 | ±1.297745 | 12.02208 | <b>0.001411</b> |
| KO 1mM                                                                | 32.70434 | ±2.054847 | 0.315582 | 0.577855        |
| KO 3mM                                                                | 22.78229 | ±1.189044 | 14.28671 | <b>0.000587</b> |
|                                                                       |          |           |          |                 |
| KO                                                                    | 31.38997 | ±1.899523 | 12.02208 | <b>0.001411</b> |
| KO 1mM                                                                | 32.70434 | ±2.054847 | 15.49663 | <b>0.000375</b> |
| KO 3mM                                                                | 22.78229 | ±1.189044 | 0.097649 | 0.756523        |
| <b>Figure 2d LTM Ch ANOVA F<sub>(3,42)</sub>=8.1024 p=0.0003</b>      |          |           |          |                 |
| w <sup>1118</sup>                                                     | 23.11469 | ±2.329653 | 11.119   | <b>0.001883</b> |
| w <sup>1118</sup> 3 mM                                                | 22.39416 | ±1.278105 | 17.04367 | <b>0.000186</b> |
| KO 3mM                                                                | 21.61257 | ±0.984868 | 17.56387 | <b>0.000154</b> |
|                                                                       |          |           |          |                 |
| w <sup>1118</sup> 3 mM                                                | 22.39416 | ±1.278105 | 0.084586 | 0.772717        |
| KO                                                                    | 31.50581 | ±2.021442 | 11.119   | <b>0.001883</b> |
| KO 3mM                                                                | 21.61257 | ±0.984868 | 0.329922 | 0.569004        |
| <b>Figure 2e LEARN Ch ANOVA F<sub>(3,29)</sub>=1.7055 p=0.1904</b>    |          |           |          |                 |
| w <sup>1118</sup>                                                     | 70.74035 | ±2.461677 | 3.948552 | 0.057543        |
| w <sup>1118</sup> 3 mM                                                | 73.311   | ±2.49088  | 1.598047 | 0.217396        |
| KO 3mM                                                                | 71.08758 | ±2.421351 | 3.786176 | 0.062563        |
|                                                                       |          |           |          |                 |
| w <sup>1118</sup> 3 mM                                                | 73.311   | ±2.49088  | 0.621141 | 0.43775         |
| KO                                                                    | 77.43427 | ±1.561351 | 3.948552 | 0.057543        |
| KO 3mM                                                                | 71.08758 | ±2.421351 | 0.011333 | 0.916039        |

## Supplemental Table 2

Comparisons to untreated mutant KO and untreated control w<sup>1118</sup> using LSM

| Genotype                                                              | Mean     | ± SEM     | F-ratio  | p               |
|-----------------------------------------------------------------------|----------|-----------|----------|-----------------|
| <b>Figure 3a HAB NIC ANOVA F<sub>(6,82)</sub>=62693 p=2.1933e-05</b>  |          |           |          |                 |
| w <sup>1118</sup>                                                     | 7.522862 | ±1.308846 | 9.807207 | <b>0.002468</b> |
| KO 1μM                                                                | -4.78553 | ±2.135246 | 3.278003 | 0.074167        |
| KO 10μM                                                               | 5.292224 | ±1.677629 | 5.919217 | <b>0.017328</b> |
| KO 25μM                                                               | 5.584047 | ±1.604568 | 7.822654 | <b>0.006532</b> |
| KO 50μM                                                               | -0.45913 | ±2.069378 | 0.004357 | 0.947544        |
| KO 1000μM                                                             | -0.31445 | ±1.497126 | 0.017296 | 0.895717        |
|                                                                       |          |           |          |                 |
| KO                                                                    | -0.61131 | ±1.230869 | 9.807207 | <b>0.002468</b> |
| KO 1μM                                                                | -4.78553 | ±2.135246 | 21.17225 | <b>1.65e-05</b> |
| KO 10μM                                                               | 5.292224 | ±1.677629 | 0.643871 | 0.424815        |
| KO 25μM                                                               | 5.584047 | ±1.604568 | 0.557174 | 0.457704        |
| KO 50μM                                                               | -0.45913 | ±2.069378 | 8.904027 | <b>0.003825</b> |
| KO 1000μM                                                             | -0.31445 | ±1.497126 | 8.856688 | <b>0.003914</b> |
| <b>Figure 3b HAB NIC ANOVA F<sub>(3,60)</sub>=5.8592 p=0.0015</b>     |          |           |          |                 |
| w <sup>1118</sup>                                                     | 5.000475 | ±1.743885 | 9.515954 | <b>0.00314</b>  |
| w <sup>1118</sup> 10μM                                                | -0.43047 | ±1.62347  | 0.625689 | 0.43222         |
| KO 10μM                                                               | 5.621667 | ±1.58491  | 11.99919 | <b>0.001017</b> |
|                                                                       |          |           |          |                 |
| w <sup>1118</sup> 10μM                                                | -0.43047 | ±1.62347  | 5.548836 | <b>0.021957</b> |
| KO                                                                    | -2.22146 | ±1.501421 | 9.515954 | <b>0.00314</b>  |
| KO 10μM                                                               | 5.621667 | ±1.58491  | 0.072594 | 0.788569        |
| <b>Figure 3c HAB DON ANOVA F<sub>(4,38)</sub>=8.3120 p=8.6682e-05</b> |          |           |          |                 |
| w <sup>1118</sup>                                                     | 8.23871  | ±1.274542 | 11.40523 | <b>0.001848</b> |
| KO 0.01μM                                                             | -3.96644 | ±1.482326 | 0.255308 | 0.616622        |
| KO 1μM                                                                | 8.456491 | ±3.066199 | 12.72411 | <b>0.001098</b> |
| KO 10μM                                                               | -3.14469 | ±2.251728 | 0.055649 | 0.814925        |
|                                                                       |          |           |          |                 |
| KO                                                                    | -2.42506 | ±2.170793 | 11.40523 | <b>0.001848</b> |
| KO 0.01μM                                                             | -3.96644 | ±1.482326 | 14.94062 | <b>0.000476</b> |
| KO 1μM                                                                | 8.456491 | ±3.066199 | 0.004757 | 0.945417        |
| KO 10μM                                                               | -3.14469 | ±2.251728 | 12.99649 | <b>0.000988</b> |
| <b>Figure 3d HAB DON ANOVA F<sub>(3,63)</sub>=5.1815 p=0.0030</b>     |          |           |          |                 |
| w <sup>1118</sup>                                                     | 5.206855 | ±1.177014 | 9.928971 | <b>0.002538</b> |
| w <sup>1118</sup> 1μM                                                 | -0.00417 | ±1.507392 | 1.064177 | 0.306405        |
| KO 1μM                                                                | 5.474504 | ±2.151094 | 10.62685 | <b>0.001839</b> |
|                                                                       |          |           |          |                 |
| w <sup>1118</sup> 1μM                                                 | -0.00417 | ±1.507392 | 4.492014 | <b>0.0382</b>   |
| KO                                                                    | -2.54053 | ±1.95076  | 9.928971 | <b>0.002538</b> |
| KO 1μM                                                                | 5.474504 | ±2.151094 | 0.01185  | 0.913678        |

### Supplemental Table 3

Comparisons to untreated mutant KO and untreated control w<sup>1118</sup> using LSM

| Genotype                                                          | Mean     | ± SEM     | F-ratio  | p               |
|-------------------------------------------------------------------|----------|-----------|----------|-----------------|
| <b>Figure 4a HAB CDP ANOVA F<sub>(3,36)</sub>=3.3156 p=0.0062</b> |          |           |          |                 |
| w <sup>1118</sup>                                                 | 8.363102 | ±1.044943 | 15.36117 | <b>0.000204</b> |
| KO 0.01mM                                                         | 2.400986 | ±2.269803 | 1.876068 | 0.17516         |
| KO 0.1mM                                                          | 1.994214 | ±1.507717 | 1.407448 | 0.239492        |
| KO 0.2mM                                                          | -0.33736 | ±2.395516 | 0.018357 | 0.892614        |
| KO 1mM                                                            | -0.29214 | ±1.535303 | 0.024295 | 0.876584        |
| KO 3mM                                                            | -0.80847 | ±2.148777 | 0.005905 | 0.938965        |
|                                                                   |          |           |          |                 |
| KO                                                                | -0.63797 | ±1.029239 | 15.36117 | <b>0.000204</b> |
| KO 0.01mM                                                         | 2.400986 | ±2.269803 | 5.320765 | <b>0.024037</b> |
| KO 0.1mM                                                          | 1.994214 | ±1.507717 | 6.071563 | <b>0.016197</b> |
| KO 0.2mM                                                          | -0.33736 | ±2.395516 | 11.33074 | <b>0.001241</b> |
| KO 1mM                                                            | -0.29214 | ±1.535303 | 11.21327 | <b>0.00131</b>  |
| KO 3mM                                                            | -0.80847 | ±2.148777 | 12.59102 | <b>0.000697</b> |
| <b>Figure 4b HAB BET ANOVA F<sub>(4,66)</sub>=7.2791 p=2.8442</b> |          |           |          |                 |
| w <sup>1118</sup>                                                 | 5.801767 | ±0.516729 | 6.771057 | <b>0.011574</b> |
| KO 0.5mM                                                          | 4.592503 | ±1.979938 | 5.655917 | <b>0.020492</b> |
| KO 1mM                                                            | 4.477649 | ±1.73753  | 5.452705 | <b>0.02279</b>  |
| KO 3mM                                                            | 6.241375 | ±1.792847 | 9.77959  | <b>0.002687</b> |
|                                                                   |          |           |          |                 |
| KO                                                                | -1.74294 | ±2.272631 | 6.771057 | <b>0.011574</b> |
| KO 0.5mM                                                          | 4.592503 | ±1.979938 | 0.186025 | 0.667741        |
| KO 1mM                                                            | 4.477649 | ±1.73753  | 0.22304  | 0.638391        |
| KO 3mM                                                            | 6.241375 | ±1.792847 | 0.026536 | 0.871129        |
| <b>Figure 4c HAB BET ANOVA F<sub>(3,52)</sub>=6.3705 p=0.0010</b> |          |           |          |                 |
| w <sup>1118</sup>                                                 | 7.983473 | ±0.968104 | 15.11552 | <b>0.000304</b> |
| w <sup>1118</sup> 0.5 mM                                          | 1.592    | ±1.934719 | 1.93209  | 0.170813        |
| KO 0.5 mM                                                         | 5.900976 | ±1.335885 | 10.96462 | <b>0.001749</b> |
|                                                                   |          |           |          |                 |
| w <sup>1118</sup> 0.5 mM                                          | 1.592    | ±1.934719 | 6.334574 | <b>0.015163</b> |
| KO                                                                | -1.72667 | ±2.123931 | 15.11552 | <b>0.000304</b> |
| KO 0.5 mM                                                         | 5.900976 | ±1.335885 | 0.716259 | 0.401488        |

**Supplemental Table 4:**  
**Comparisons to untreated mutant KO and untreated control w<sup>1118</sup> using LSM**

| Genotype                                                            | Mean     | ± SEM     | F-ratio  | p               |
|---------------------------------------------------------------------|----------|-----------|----------|-----------------|
| <b>Figure 5a LTM NIC ANOVA F<sub>(3,42)</sub>=5.6596 p=0.0026</b>   |          |           |          |                 |
| KO                                                                  | 35.88743 | ±1.718423 |          |                 |
| KO 1μM                                                              | 32.9828  | ±1.734936 | 1.491889 | 0.229256        |
| KO 10μM                                                             | 26.07858 | ±1.49105  | 16.20326 | <b>0.000254</b> |
| KO 25μM                                                             | 32.26669 | ±1.801548 | 2.318193 | 0.135937        |
| <b>Figure 5b LTM ANOVA F<sub>(3,47)</sub>=26.1513 p=7.2449e-10</b>  |          |           |          |                 |
| w <sup>1118</sup>                                                   | 28.79113 | ±0.808981 | 51.59223 | <b>6.17e-09</b> |
| w <sup>1118</sup> 10μM                                              | 29.20465 | ±0.356038 | 45.51975 | <b>2.69e-08</b> |
| KO 10μM                                                             | 28.34533 | ±0.380377 | 58.56449 | <b>1.28e-09</b> |
|                                                                     |          |           |          |                 |
| w <sup>1118</sup> 10μM                                              | 29.20465 | ±0.356038 | 0.190044 | 0.665011        |
| KO                                                                  | 35.60448 | ±0.934702 | 51.59223 | <b>6.17e-09</b> |
| KO 10μM                                                             | 28.34533 | ±0.380377 | 0.220873 | 0.640697        |
| <b>Figure 5c LEARN NIC ANOVA F<sub>(3,32)</sub>=23315 p=0.0140</b>  |          |           |          |                 |
| w <sup>1118</sup>                                                   | 68.79916 | ±0.742959 | 2.90064  | 0.09924         |
| w <sup>1118</sup> 10μM                                              | 71.69246 | ±0.450789 | 0.645399 | 0.428299        |
| KO 10μM                                                             | 69.81896 | ±0.86201  | 0.711373 | 0.405892        |
|                                                                     |          |           |          |                 |
| w <sup>1118</sup> 10μM                                              | 71.69246 | ±0.450789 | 6.282511 | 0.068052        |
| KO                                                                  | 70.76512 | ±1.02447  | 2.90064  | 0.09924         |
| KO 10μM                                                             | 69.81896 | ±0.86201  | 0.826414 | 0.370805        |
| <b>Figure 5d LTM DON ANOVA F<sub>(4,49)</sub>=3.5179 p=0.0140</b>   |          |           |          |                 |
| KO                                                                  | 32.54571 | ±2.245852 |          |                 |
| KO 0.05μM                                                           | 21.05571 | ±1.240927 | 11.68162 | <b>0.00135</b>  |
| KO 0.1μM                                                            | 30.79796 | ±2.542522 | 0.318552 | 0.575282        |
| KO 1μM                                                              | 29.23695 | ±1.990425 | 1.188874 | 0.281361        |
| KO 10μM                                                             | 31.21438 | ±2.598301 | 0.167151 | 0.684596        |
| <b>Figure 5e LTM DON ANOVA F<sub>(3,40)</sub>=7.3210 p=0.0006</b>   |          |           |          |                 |
| w <sup>1118</sup>                                                   | 26.69911 | ±1.442103 | 7.86579  | <b>0.00798</b>  |
| w <sup>1118</sup> 50nM                                              | 24.11612 | ±1.83102  | 13.76205 | <b>0.000678</b> |
| KO 50nM                                                             | 23.20001 | ±1.196891 | 17.47902 | <b>0.000171</b> |
|                                                                     |          |           |          |                 |
| w <sup>1118</sup> 50nM                                              | 24.11612 | ±1.83102  | 0.89623  | 0.349937        |
| KO                                                                  | 33.83009 | ±2.379248 | 7.86579  | <b>0.00798</b>  |
| KO 50nM                                                             | 23.20001 | ±1.196891 | 1.736073 | 0.195738        |
| <b>Figure 5f LEARN DON ANOVA F<sub>(3,34)</sub>=1.7747 p=0.1725</b> |          |           |          |                 |
| w <sup>1118</sup>                                                   | 75.38729 | ±1.590571 | 6.26e-07 | 0.999374        |
| w <sup>1118</sup> 50nM                                              | 78.36953 | ±1.998805 | 1.707075 | 0.200976        |
| KO 50nM                                                             | 79.78194 | ±1.717444 | 3.490244 | 0.071209        |
|                                                                     |          |           |          |                 |
| w <sup>1118</sup> 50nM                                              | 78.36953 | ±1.998805 | 1.709143 | 0.200711        |
| KO                                                                  | 75.3891  | ±1.123719 | 6.26e-07 | 0.999374        |
| KO 50nM                                                             | 79.78194 | ±1.717444 | 3.493114 | 0.071099        |

# Supplemental Table 5

Comparisons to untreated mutant KO and untreated control w<sup>1118</sup> using LSM

| Genotype                                                                | Mean     | ± SEM     | F-ratio  | p               |
|-------------------------------------------------------------------------|----------|-----------|----------|-----------------|
| <b>Figure 6a LTM CDP ANOVA F<sub>(3,48)</sub>=6.6616 p=0.0008</b>       |          |           |          |                 |
| KO                                                                      | 28.27479 | ±1.003411 |          |                 |
| KO 0.2mM                                                                | 22.90568 | ±0.783726 | 13.80358 | <b>0.000559</b> |
| KO 1mM                                                                  | 28.03684 | ±1.514802 | 0.025175 | 0.874641        |
| KO 3mM                                                                  | 27.95447 | ±0.736447 | 0.043639 | 0.835469        |
| <b>Figure 6b LTM CDP ANOVA F<sub>(3,45)</sub>=23.8481 p=3.60047e-09</b> |          |           |          |                 |
| w <sup>1118</sup>                                                       | 20.78993 | ±1.171587 | 50.08619 | <b>1.13e-08</b> |
| w <sup>1118</sup> 0.2mM                                                 | 22.51203 | ±1.184167 | 32.53968 | <b>1.06e-06</b> |
| KO 0.2mM                                                                | 20.17511 | ±0.504368 | 54.11325 | <b>4.52e-09</b> |
|                                                                         |          |           |          |                 |
| w <sup>1118</sup> 0.2mM                                                 | 22.51203 | ±1.184167 | 1.48168  | 0.230307        |
| KO                                                                      | 30.58232 | ±0.949652 | 50.08619 | <b>1.13e-08</b> |
| KO 0.2mM                                                                | 20.17511 | ±0.504368 | 0.188853 | 0.666097        |
| <b>Figure 6c LEARN CDP ANOVA F<sub>(3,32)</sub>=0.9089 p=0.4153</b>     |          |           |          |                 |
| w <sup>1118</sup>                                                       | 80.95128 | ±2.104626 | 1.862475 | 0.182836        |
| w <sup>1118</sup> 0.2mM                                                 | 80.37554 | ±2.422813 | 1.387971 | 0.248325        |
| KO 0.2mM                                                                | 81.42671 | ±2.662977 | 2.3068   | 0.139637        |
|                                                                         |          |           |          |                 |
| w <sup>1118</sup> 0.2mM                                                 | 80.37554 | ±2.422813 | 0.032886 | 0.857358        |
| KO                                                                      | 76.74061 | ±1.64706  | 1.862475 | 0.182836        |
| KO 0.2mM                                                                | 81.42671 | ±2.662977 | 0.022425 | 0.881999        |
| <b>Figure 6d LTM BET ANOVA F<sub>(3,46)</sub>=0.8348 p=0.4822</b>       |          |           |          |                 |
| KO                                                                      | 34.35632 | ±1.354638 |          |                 |
| KO 0.5mM                                                                | 31.918   | ±1.459656 | 1.24024  | 0.271611        |
| KO 1mM                                                                  | 31.77245 | ±1.926871 | 1.33217  | 0.254794        |
| KO 3mM                                                                  | 31.12805 | ±1.519848 | 2.174018 | 0.147643        |
| <b>Figure 6e LEARN BET ANOVA F<sub>(3,31)</sub>=1.4639 p=0.2457</b>     |          |           |          |                 |
| w <sup>1118</sup>                                                       | 71.76252 | ±0.681772 | 0.145012 | 0.706222        |
| w <sup>1118</sup> 0.5mM                                                 | 70.14903 | ±0.643511 | 4.016212 | 0.064825        |
| KO 0.5mM                                                                | 71.55074 | ±0.836142 | 0.364367 | 0.55095         |
|                                                                         |          |           |          |                 |
| w <sup>1118</sup> 0.5mM                                                 | 70.14903 | ±0.643511 | 2.540432 | 0.122192        |
| KO                                                                      | 72.12444 | ±0.583913 | 0.145012 | 0.706222        |
| KO 0.5mM                                                                | 71.55074 | ±0.836142 | 0.046892 | 0.830132        |
